# Supplementary material for: Heterozygous LRP1 deficiency causes developmental dysplasia of the hip by impairing triradiate chondrocytes differentiation due to inhibition of autophagy
Source: PubMed Central journal article supplement (PMC9477389; doi:10.1073/pnas.2203557119), 2022-09-06

## Supplemental Materials

**Supplemental Table 1.** Clinical information of the DDH patients carrying *LRPI* variants.

**Supplementary Fig. 1.** Information and radiographic features of the DDH patients carrying *LRPI* variants.

**Supplementary Fig. 2.** *LRPI* variants in DDH. a) Pedigrees and Sanger sequencing results of two families carrying heterozygous *LRPI* missense variants. The position of each variant is indicated by an arrow in the sequence chromatogram. (b) Amino acid alignments in different species around the missense variant. p.R1783 and p.T2129 are highly evolutionarily conserved. (c) *LRPI* variants identified in non-familial DDH patients.

**Supplementary Fig. 3.** Data on the *Lrp1* model mice. a) Sanger sequencing of heterozygous and homozygous *Lrp1*<sup>R1783W</sup> mice their wild-type littermates (WT). b) Western blot for *Lrp1*. Hip articular tissues were isolated from heterozygous (HET) and homozygous (HOM) *Lrp1*<sup>R1783W</sup> mice and *Lrp1*<sup>+/-</sup> mice, and their WT littermates at age 4 weeks. WT1 and WT2 are littermates of KI and *Lrp1*<sup>+/-</sup> mice, respectively. Relative protein levels were determined by a density analysis. Values are means ± SD for 3 independent experiments (n = 9). \*p < 0.05; \*\*p < 0.01; \*\*\*p < 0.0001.

**Supplementary Fig. 4.** Acetabulum of *Lrp1*<sup>R1783W</sup> mice and their wild-type littermates at 8 weeks. Homozygous KI and heterozygous KI mice showed similar views with their WT littermates.

**Supplementary Fig. 5.** The Alizarin red staining and Alcian blue staining of ADTC5 after the chondrogenic differentiation induced with 1% ITS for 7 days. The positive results of Alcian blue staining and negative results of Alizarin red staining indicating that the cells differentiated into chondrocytes under the induction of chondrogenic differentiation medium. Scale bar for 4x: 500  $\mu\text{m}$ , for 40x: 50  $\mu\text{m}$

**Supplementary Fig. 6.** Western-blot for levels of autophagy and  $\beta$ -catenin in chondrogenesis induced ADTC5 cells on day 1, 4, 7, 10, and 12.

**Supplementary Fig. 7.** Western-blot for levels of upstream proteins (p-GSK3 $\beta$ , Lrp6, Dvl2 and GSK3 $\beta$ ) of  $\beta$ -catenin in Wnt signaling.

Supplement Table 1. Clinical information of the DDH patients carrying *LRPI* variants.

| Patient No. | Age             | Site      | Acetabulum index |       |
|-------------|-----------------|-----------|------------------|-------|
|             |                 |           | Left             | Right |
| 2621        | 2 years 1 month | Bilateral | 43               | 40    |
| 2726        | 1 year 5 months | Left      | 34               | 28    |
| 3193        | 5 months        | Right     | 25               | 30    |
| 3151        | 4 months        | Left      | 42               | 27    |
| 3211        | 6 months        | Right     | 28               | 32    |
| 3196        | 8 months        | Left      | 37               | 26    |
| 3161        | 1 year 8 months | Bilateral | 30               | 33    |
| 3174        | 1 year          | Right     | 31               | 41    |
| 3210        | 1 year 6 months | Bilateral | 32               | 34    |

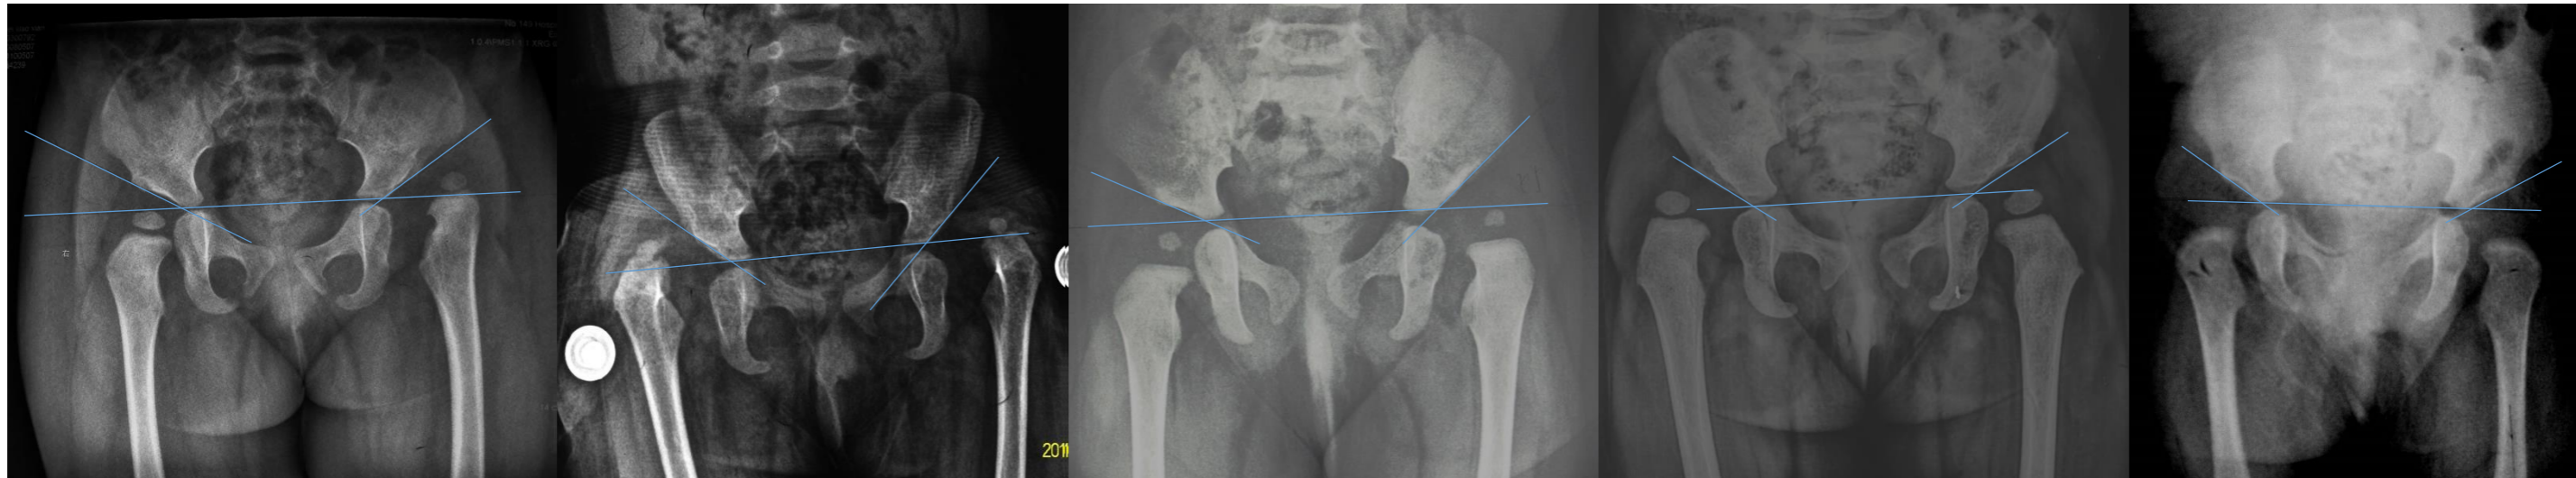

2621

2726

3151

3161

3211

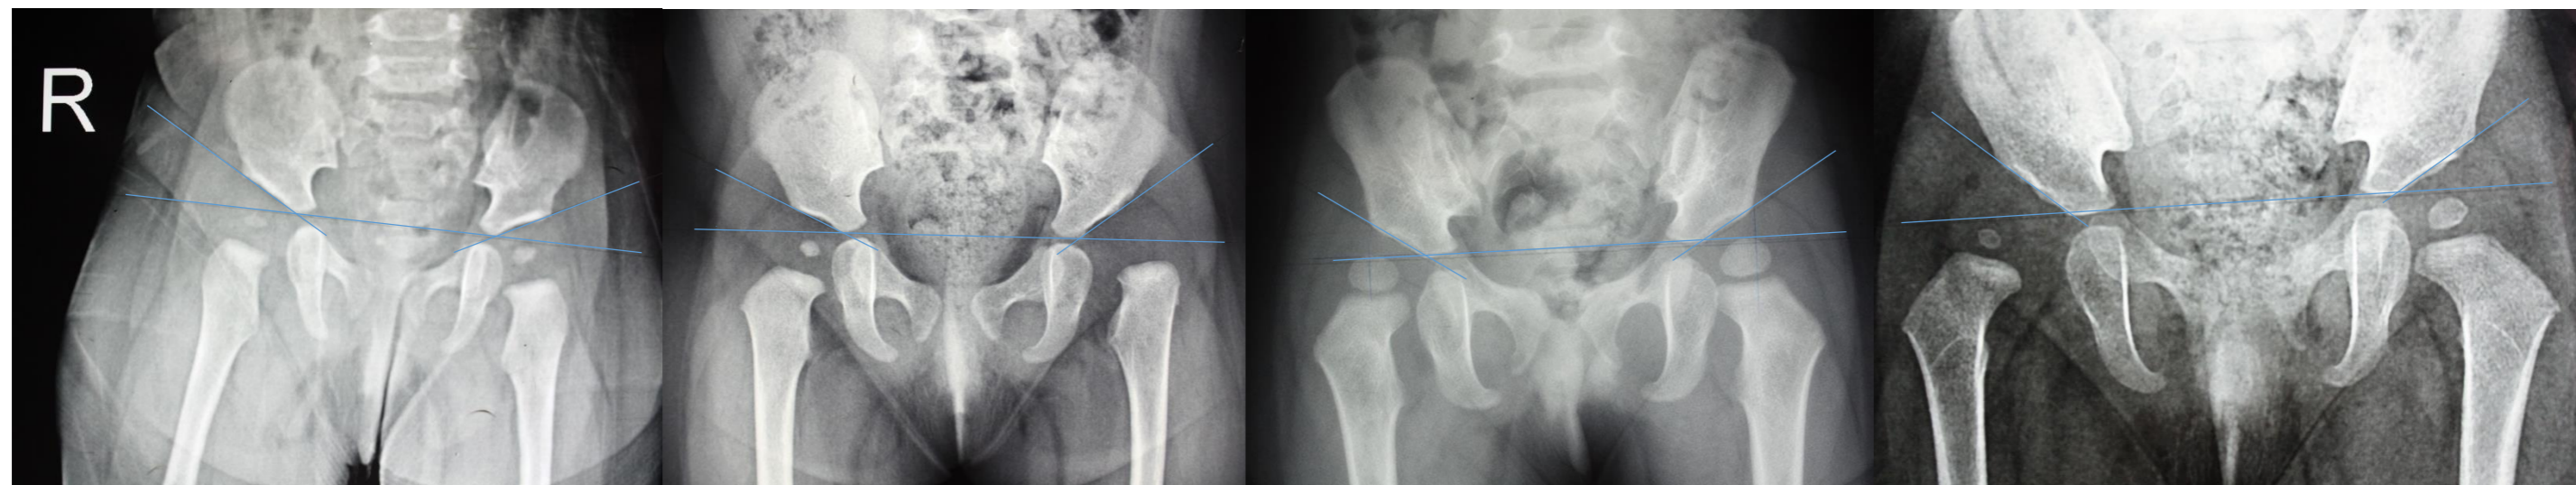

3193

3196

3210

3174

**(a)**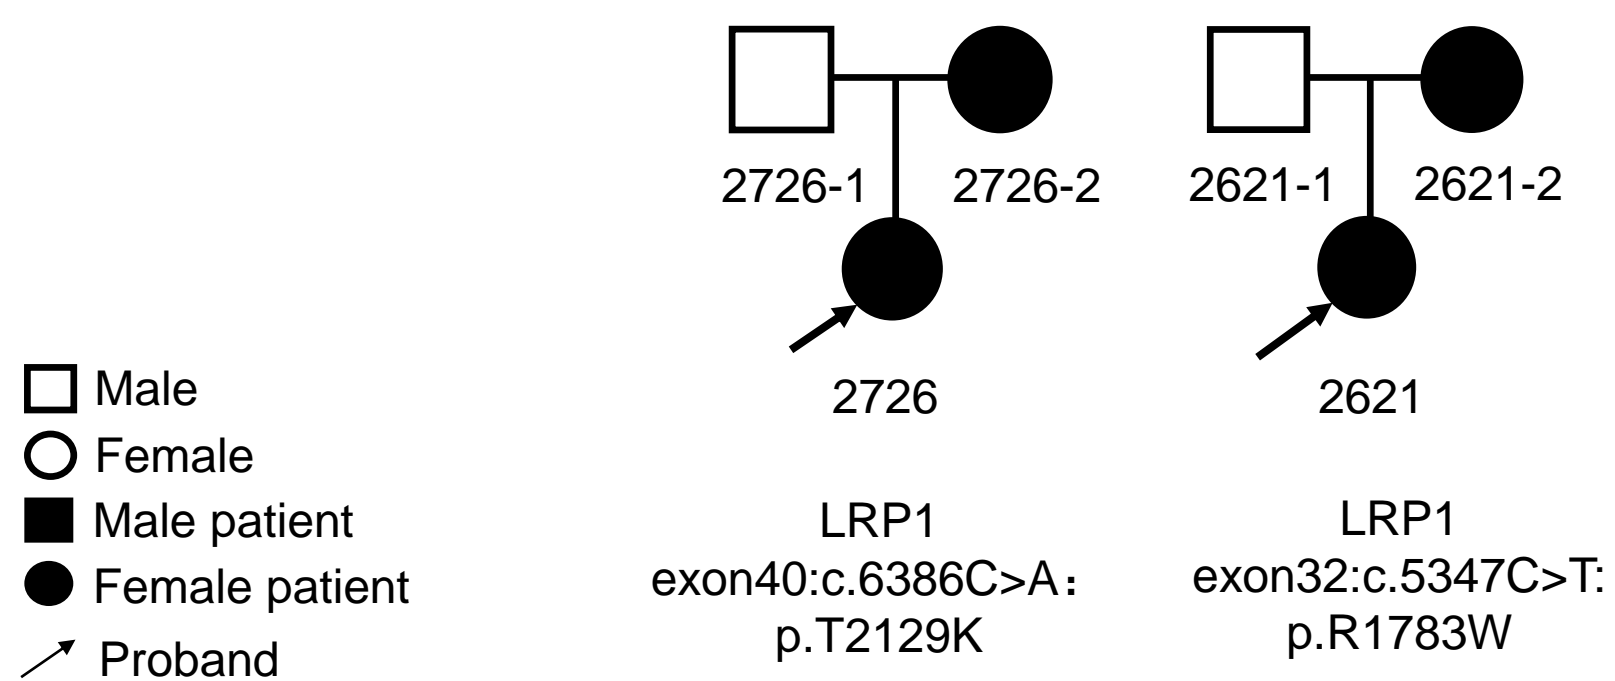

Chr12: 57578911 LRP1: NM\_002332:exon40: c.6386C&gt;A: p.T2129K

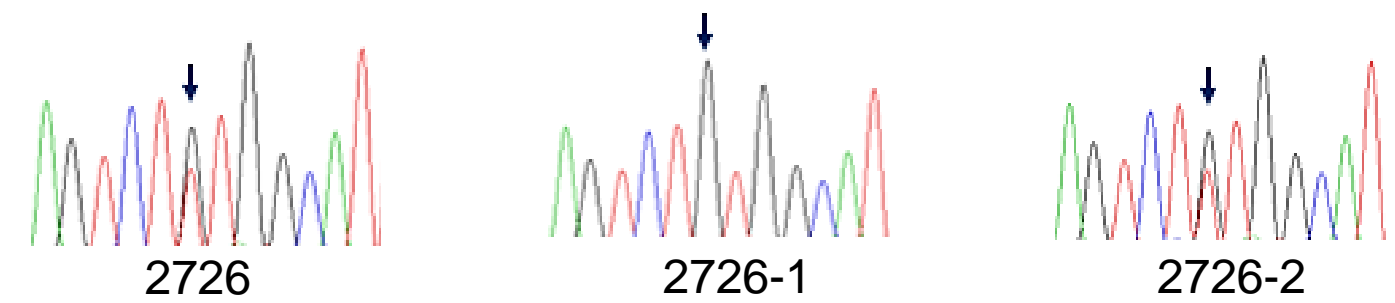

Chr12: 57574223 LRP1: NM\_002332:exon32: c.5347C&gt;T: p.R1783W

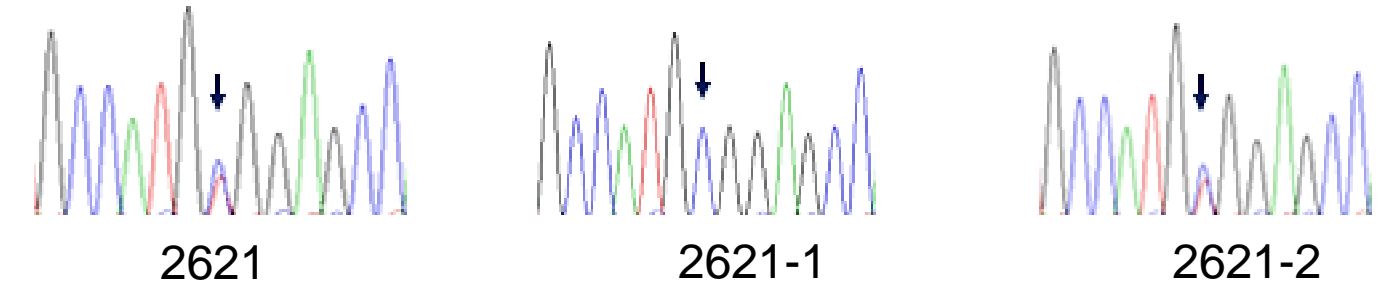**(b)****LRP1**

Homo sapiens XP\_016874792.1

Hylobates moloch XP\_032027909.1

Macaca mulatta EHH20885.1

Pan troglodytes PNI39335.1

Panthera tigris altaica XP\_015392716.1

Panthera pardus XP\_019310396.1

Chrysochloris asiatica XP\_006859524.1

Microcebus murinus XP\_012632486.1

Balaenoptera acutorostrata scammoni XP\_028021545.1

Cercocebus atys XP\_011918754.1

Erinaceus europaeus XP\_016048840.1

Theropithecus gelada XP\_025257656.1

## exon32: p.R1783

.....NLDGSGLEVIDAMRSQLGKATALAIMG.....ANGSIKRGSKDNATDSVPLRTGIGVQLK.....

.....NLDGSGLEVIDAMRSQLGKATALAIMG.....ANGSIKRGSKDNATDSVPLRTGIGVQLK.....

.....NLDGSGLEVIDAMRSQLGKATALAIMG.....ANGSIKRGSKDNATDSVPLRTGIGVQLK.....

.....NLDGSGLEVIDAMRSQLGKATALAIMG.....ANGSIKRGSKDNATDSVPLRTGIGVQLK.....

.....NLDGSGLEVIDAMRSQLGKATALAIMG.....ANGSIKRGSKDNATDSVPLRTGIGVQLK.....

.....NLDGSGLEVIDAMRNQLGKATALAIMG.....ANGSIKRGSKDNATDSVPLRTGIGVQLK.....

.....NLDGSGLEIIDAMRSQLGKATALAIMG.....ANGSIKRGSKDNATDSVPLRTGIGVQLK.....

.....NLDGSGLEIIDAMRSQLGKATALAIMG.....ANGSIKRGSKDNATDSVPLRTGIGVQLK.....

.....NLDGSGLEVIDAMRNQLGKATALAIMG.....ANGSIKRGSKDNATDSVPLRTGIGVQLK.....

.....NLDGSGLEVIEMRSQLGKATALAIMG.....ANGSIKRGSKDNATDSVPLRTGIGVQLK.....

.....NLDGSGLEVIEMRSQLGKATALAIMG.....ANGSIKRGSKDNATDSVPLRTGIGVQLK.....

.....NLDGSGLEVIEMRSQLGKATALAIMG.....ANGSIKRGSKDNATDSVPLRTGIGVQLK.....

## exon40: p.T2129

.....NLDGSGLEVIDAMRSQLGKATALAIMG.....ANGSIKRGSKDNATDSVPLRTGIGVQLK.....

.....NLDGSGLEVIDAMRSQLGKATALAIMG.....ANGSIKRGSKDNATDSVPLRTGIGVQLK.....

.....NLDGSGLEVIDAMRSQLGKATALAIMG.....ANGSIKRGSKDNATDSVPLRTGIGVQLK.....

.....NLDGSGLEVIDAMRSQLGKATALAIMG.....ANGSIKRGSKDNATDSVPLRTGIGVQLK.....

.....NLDGSGLEVIDAMRSQLGKATALAIMG.....ANGSIKRGSKDNATDSVPLRTGIGVQLK.....

.....NLDGSGLEVIDAMRNQLGKATALAIMG.....ANGSIKRGSKDNATDSVPLRTGIGVQLK.....

.....NLDGSGLEIIDAMRSQLGKATALAIMG.....ANGSIKRGSKDNATDSVPLRTGIGVQLK.....

.....NLDGSGLEIIDAMRSQLGKATALAIMG.....ANGSIKRGSKDNATDSVPLRTGIGVQLK.....

.....NLDGSGLEVIDAMRNQLGKATALAIMG.....ANGSIKRGSKDNATDSVPLRTGIGVQLK.....

.....NLDGSGLEVIEMRSQLGKATALAIMG.....ANGSIKRGSKDNATDSVPLRTGIGVQLK.....

.....NLDGSGLEVIEMRSQLGKATALAIMG.....ANGSIKRGSKDNATDSVPLRTGIGVQLK.....

.....NLDGSGLEVIEMRSQLGKATALAIMG.....ANGSIKRGSKDNATDSVPLRTGIGVQLK.....

**(c)****LRP1 variants**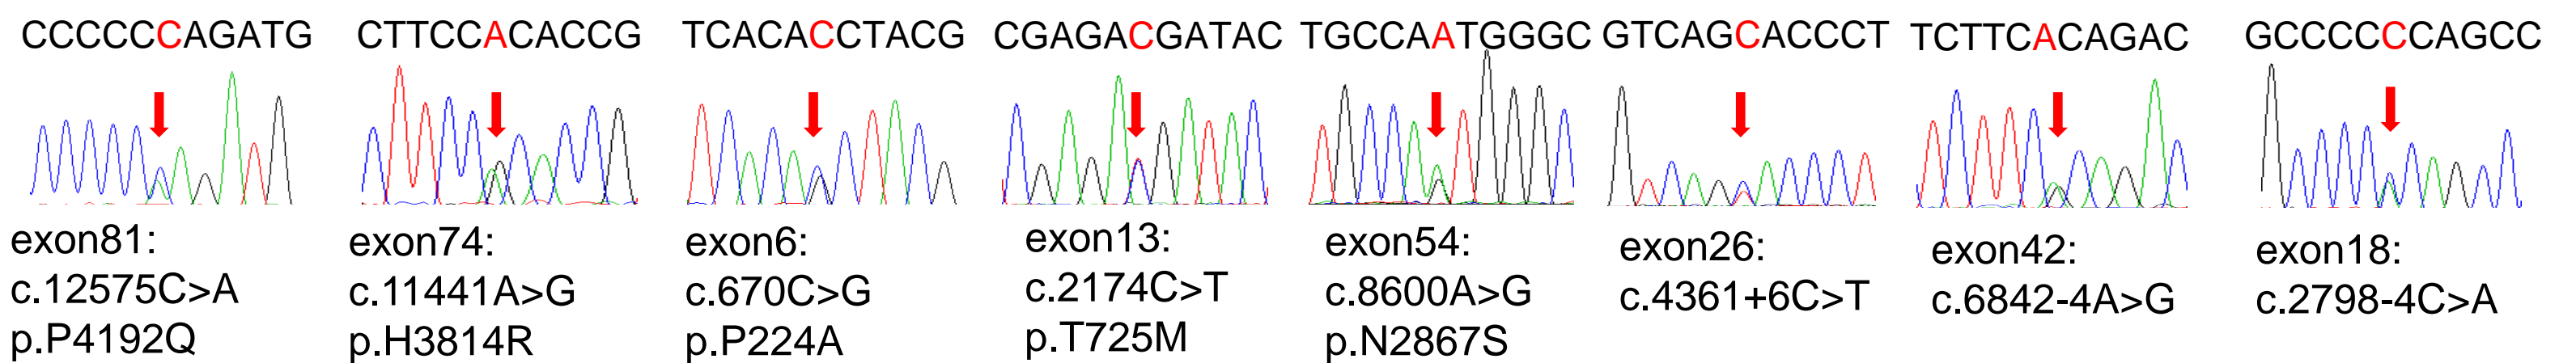**Wild Type**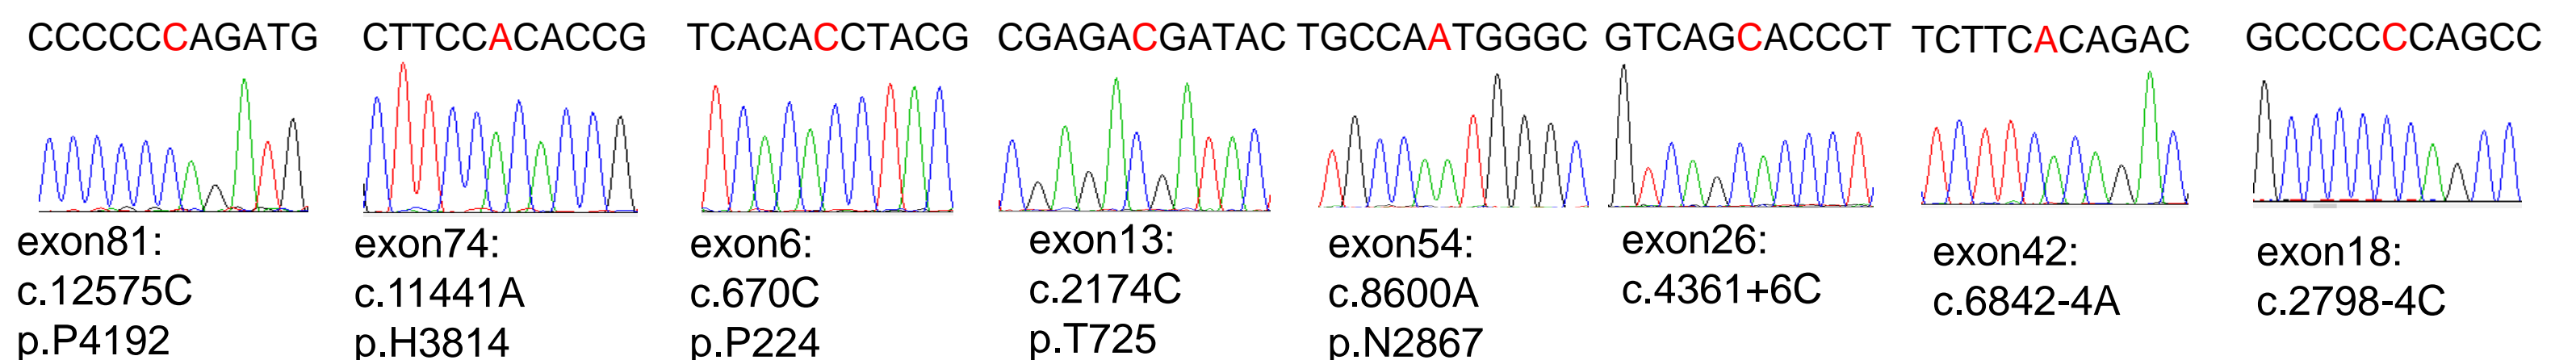

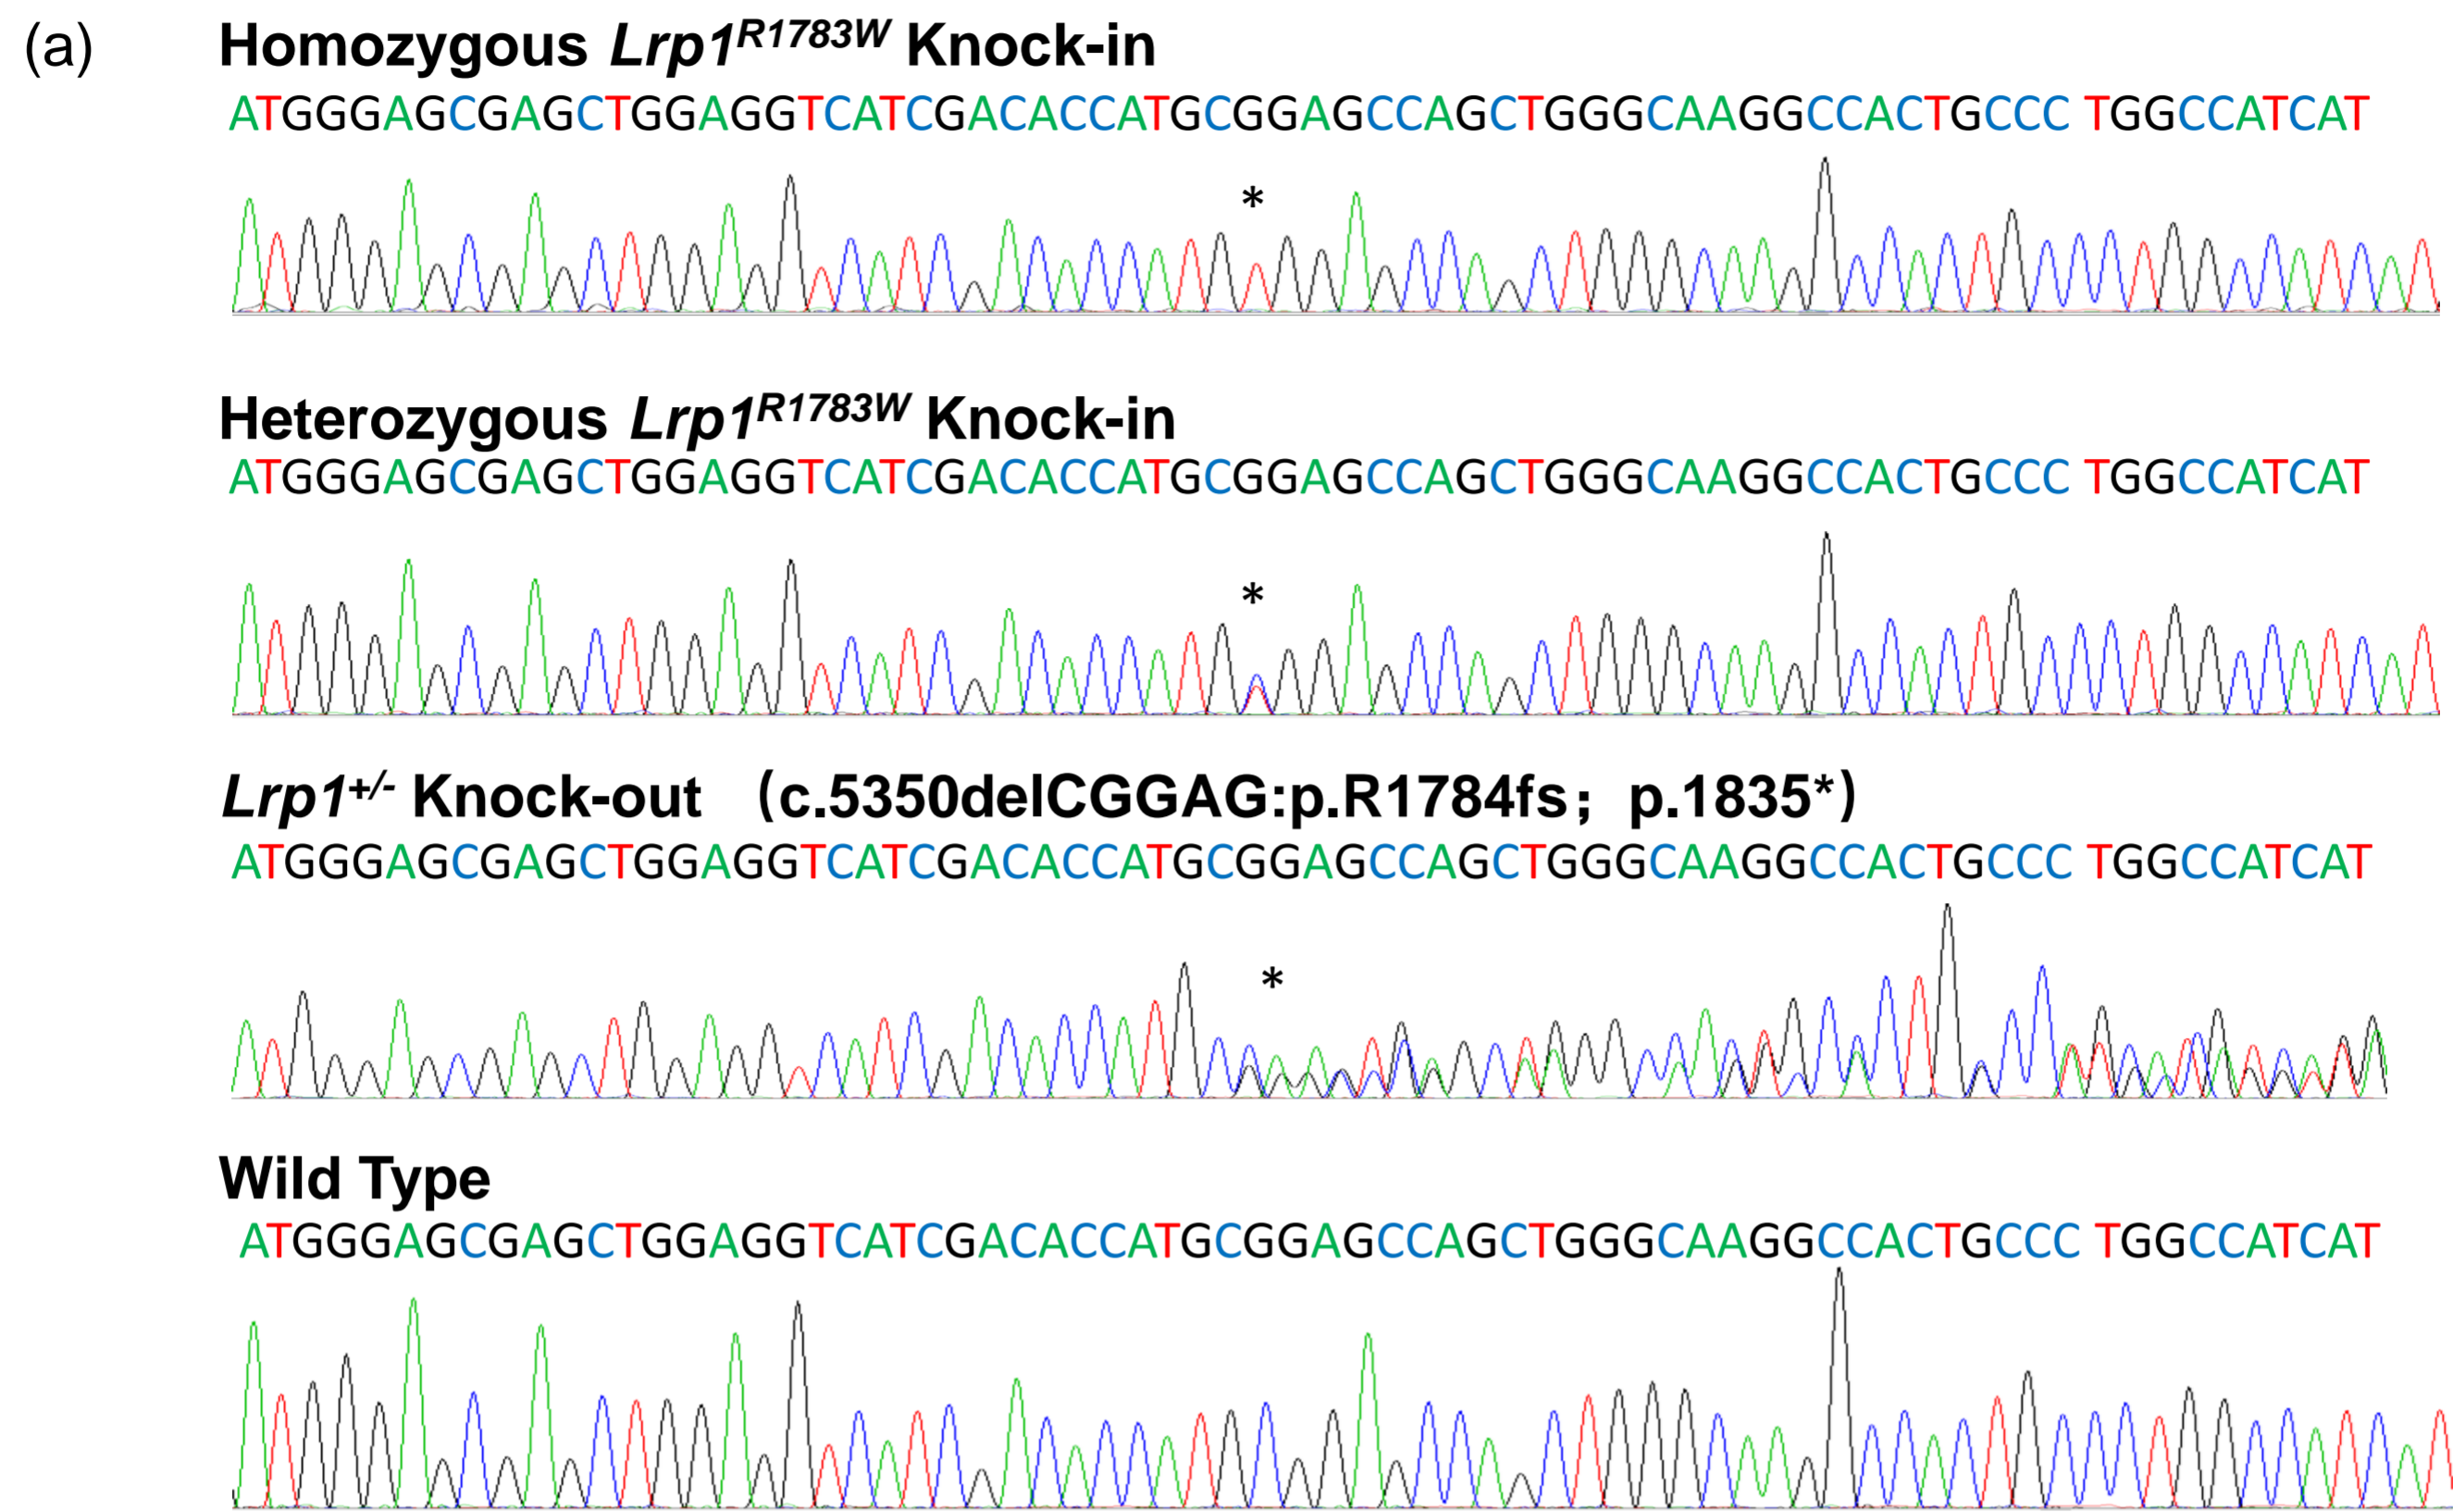

**Lrp1-Mus musculus: NM\_008512.2**

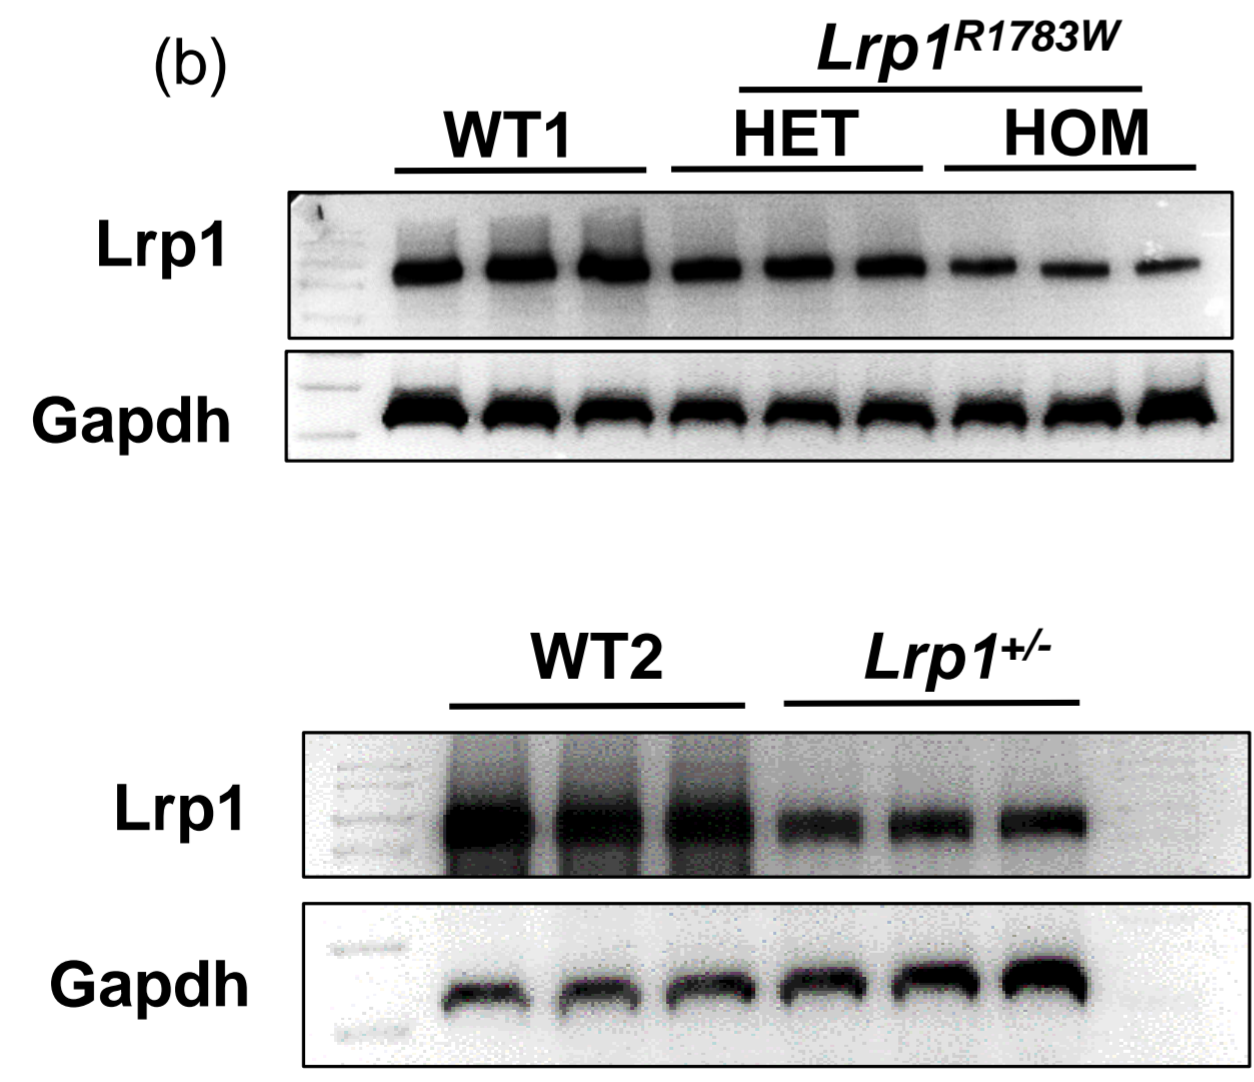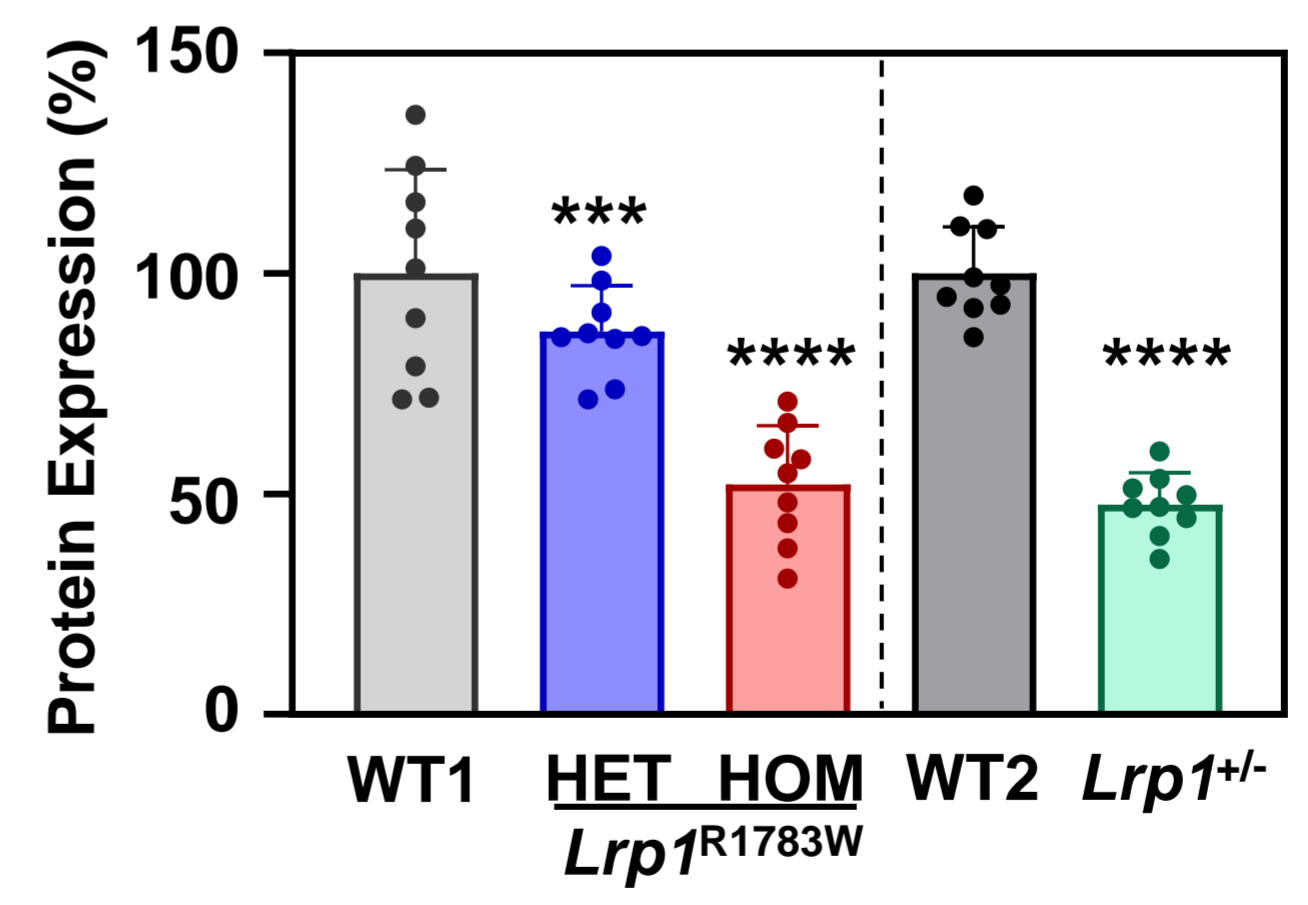

***Lrp1*<sup>R1783W</sup>**  
**HOM**

**WT**

***Lrp1*<sup>R1783W</sup>**  
**HET**

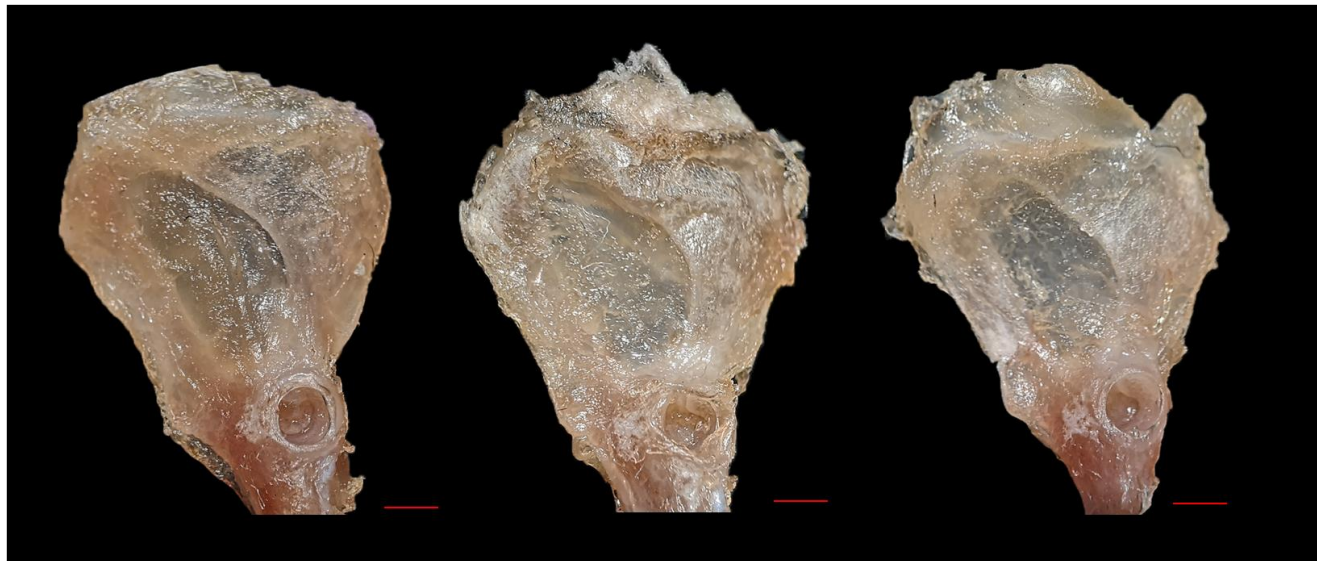

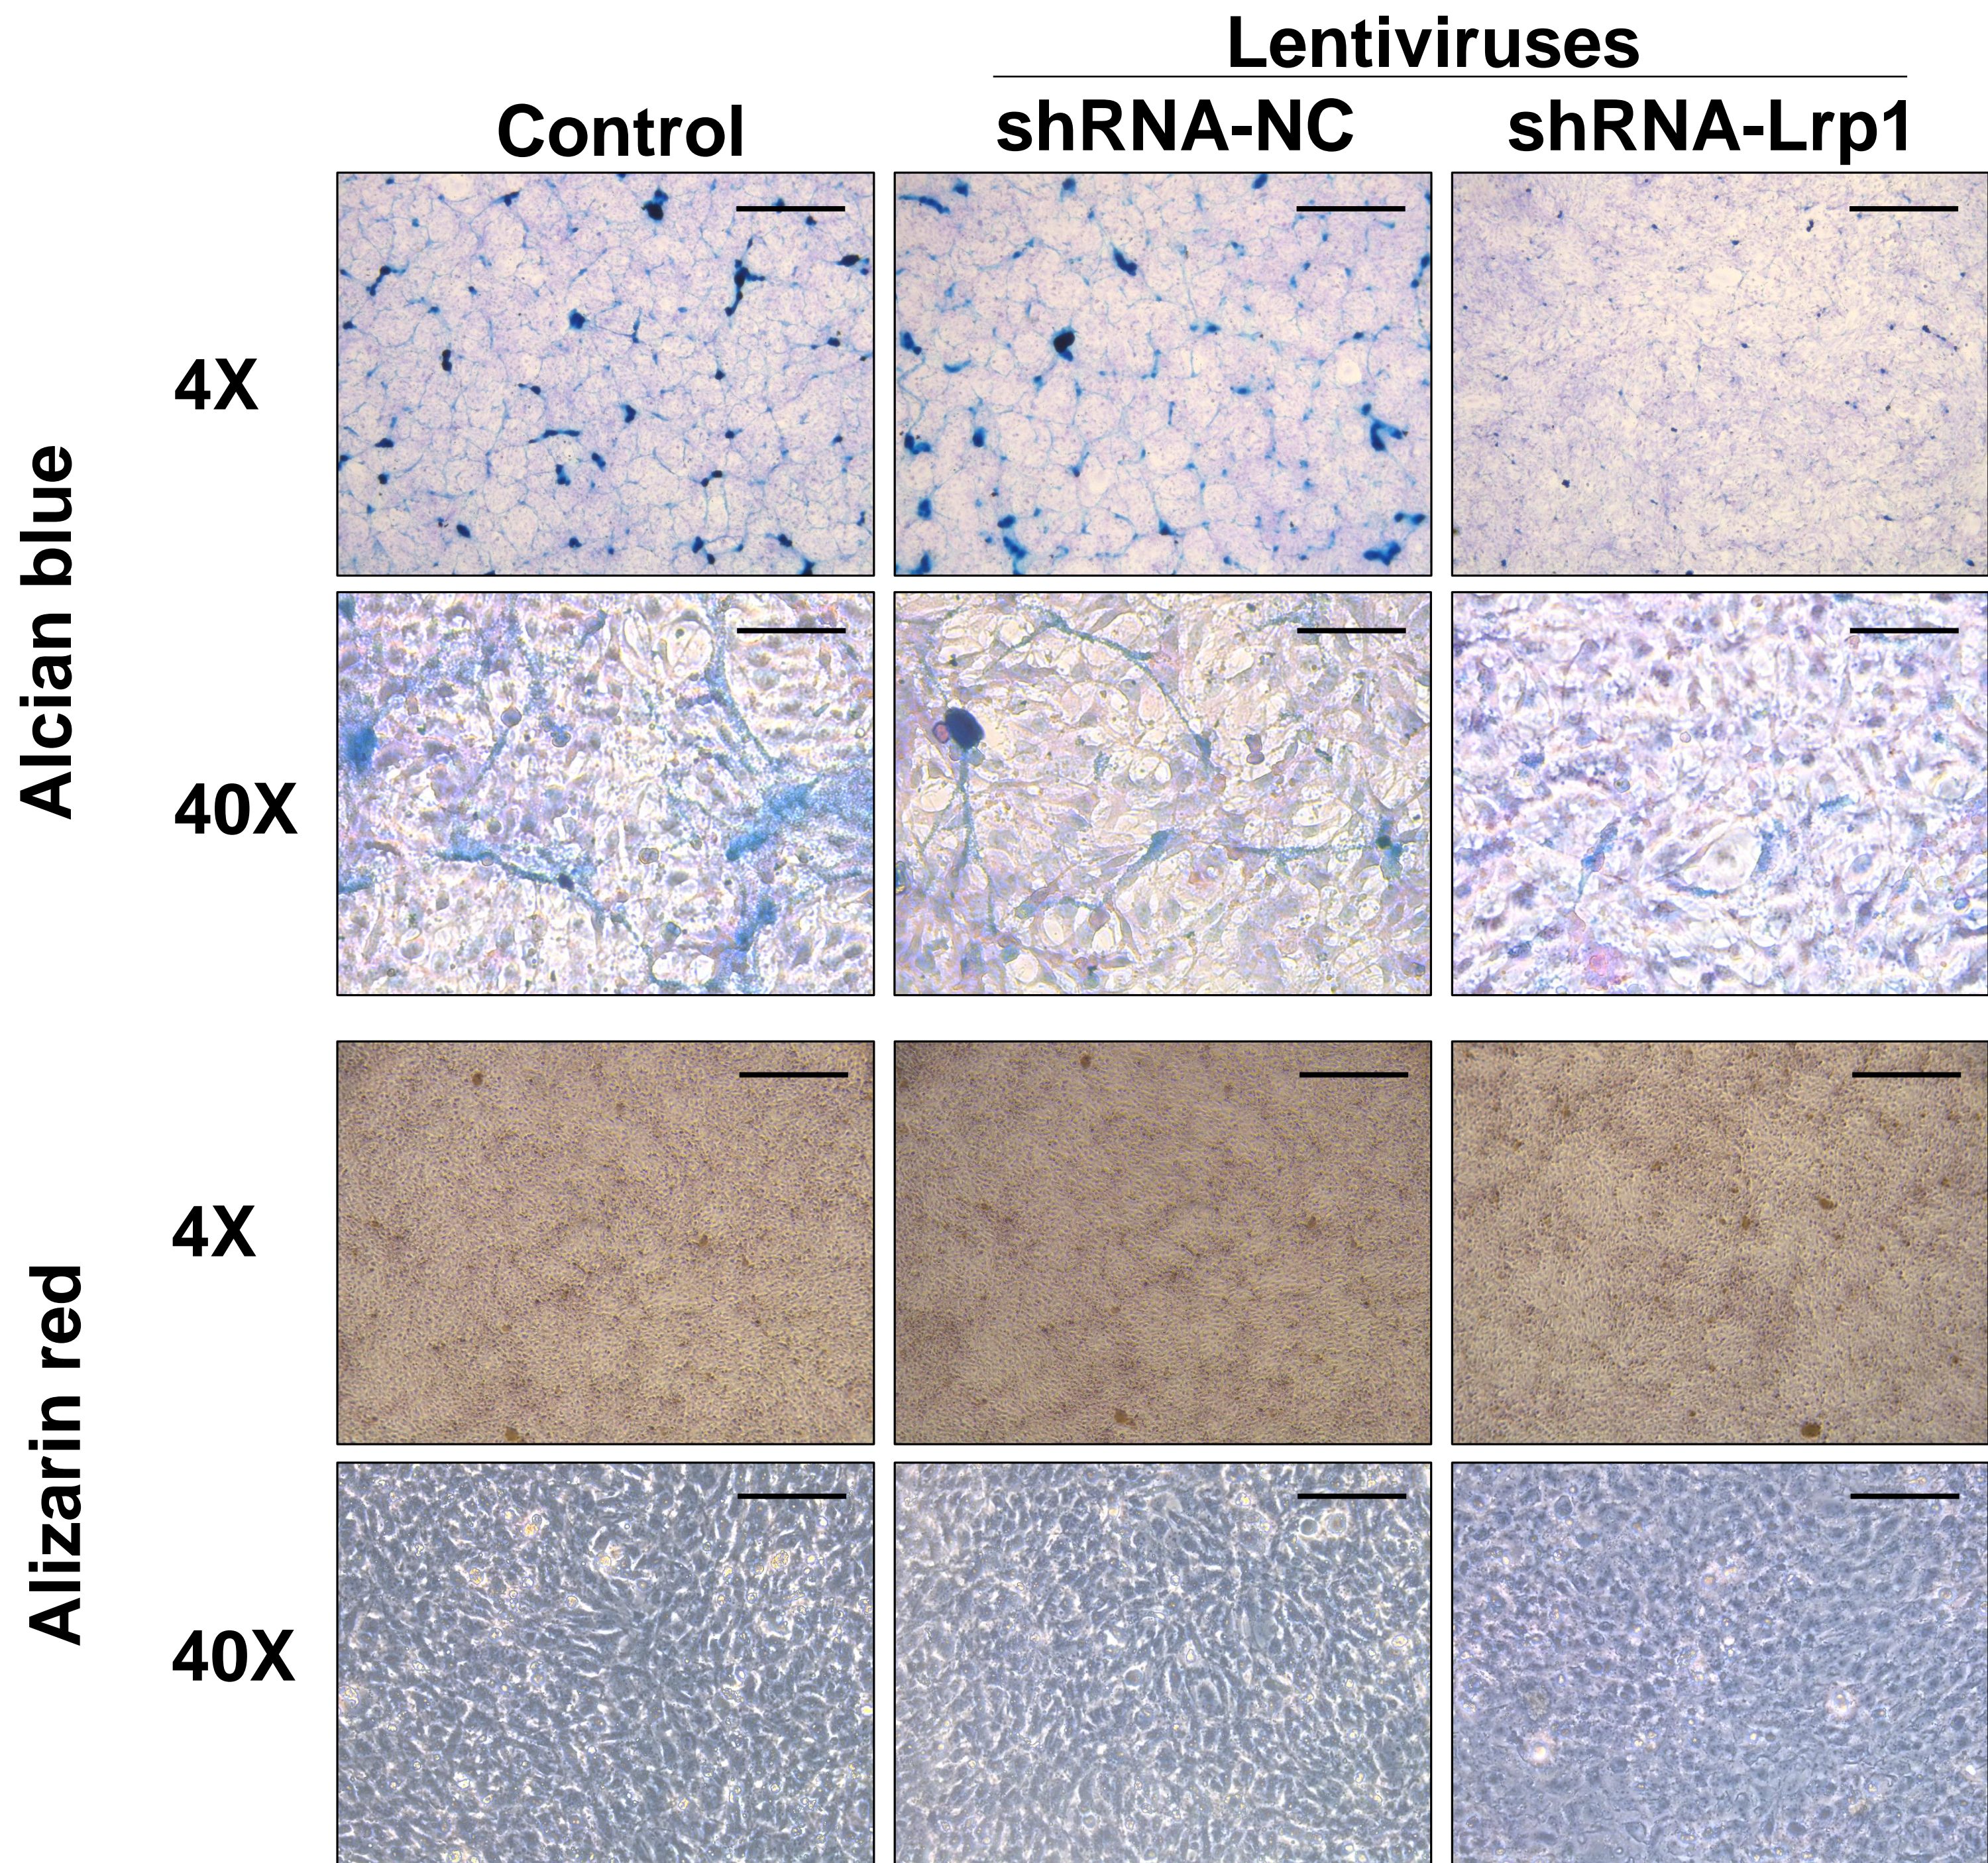



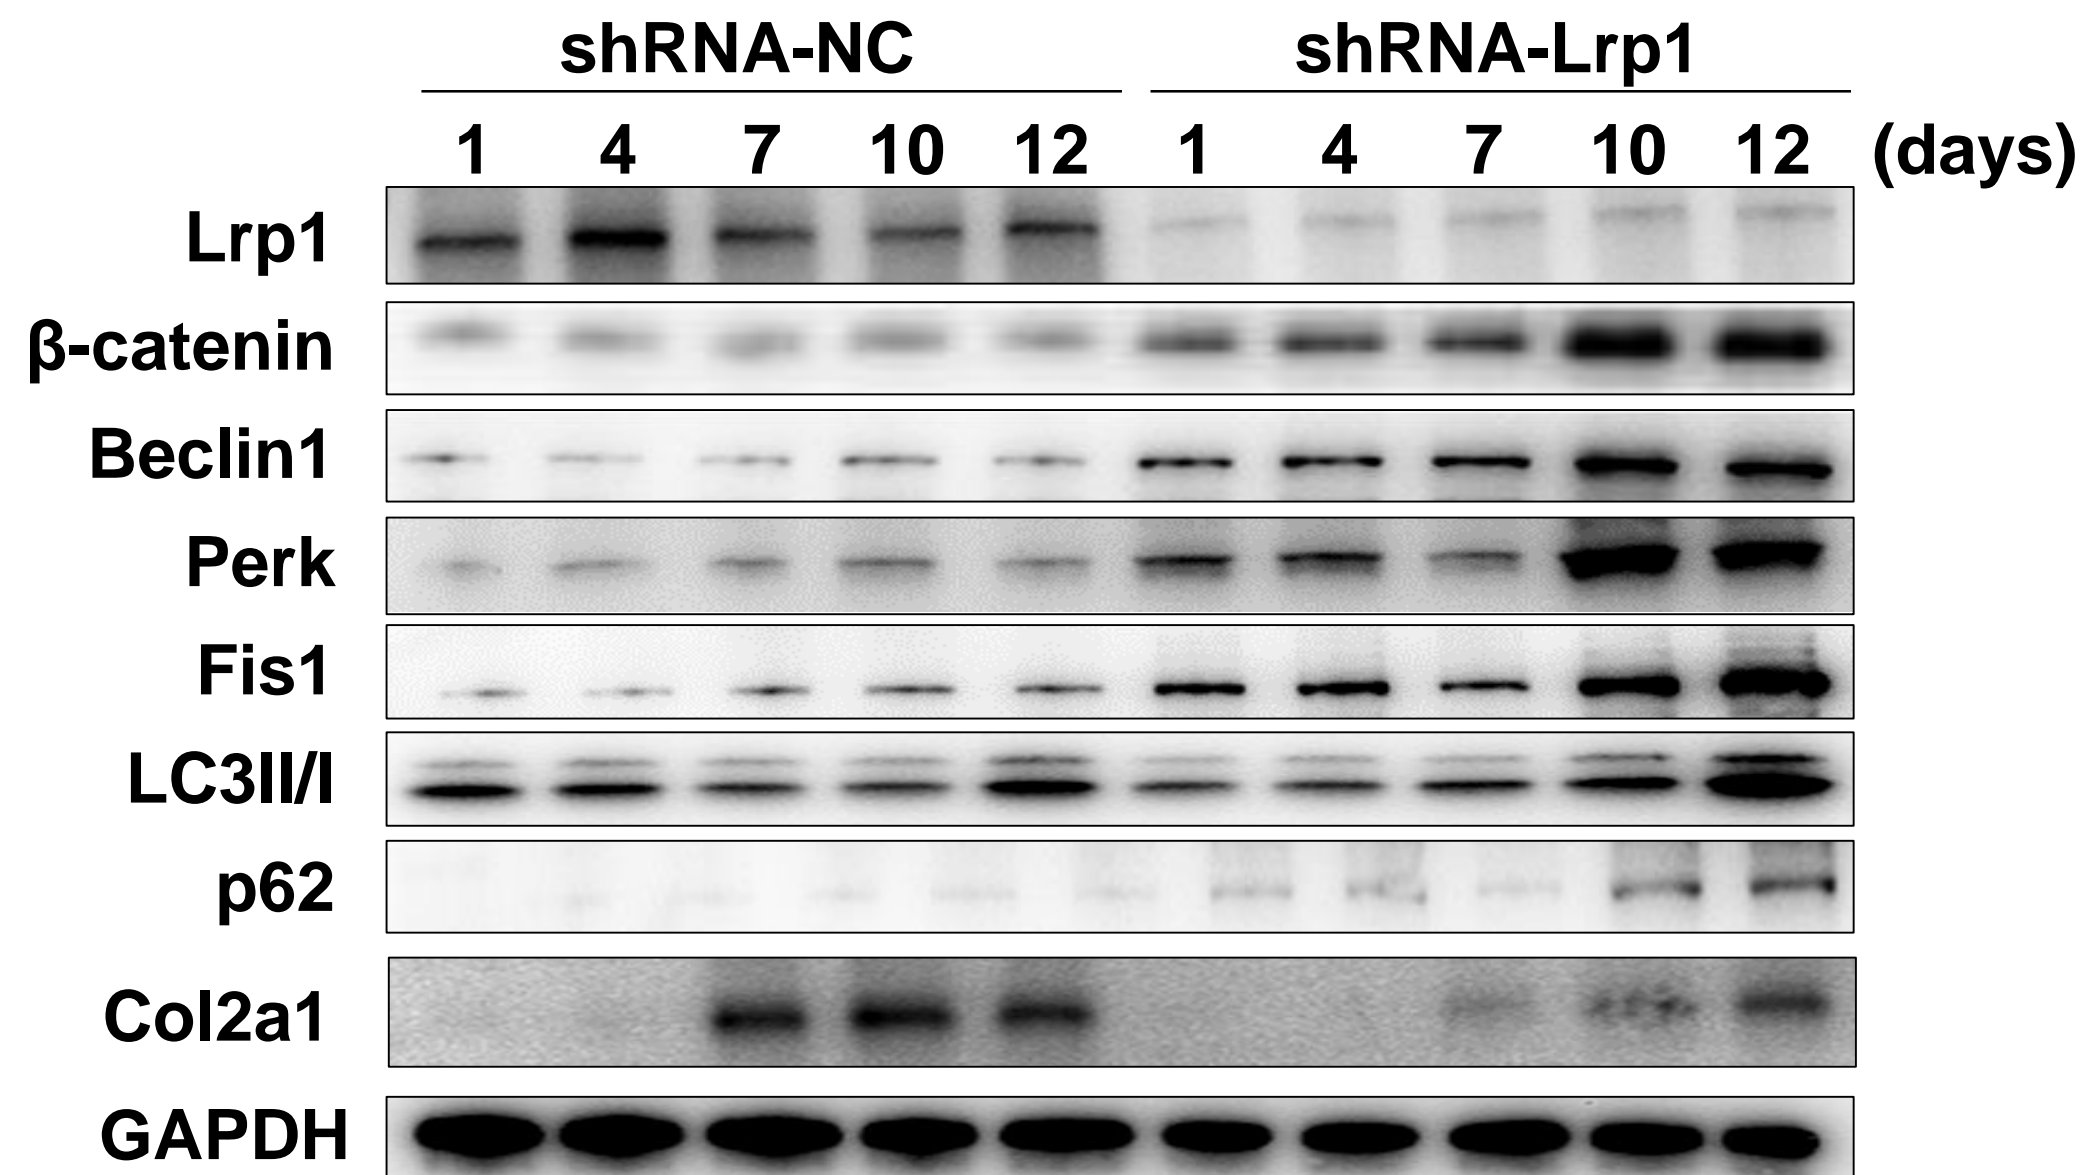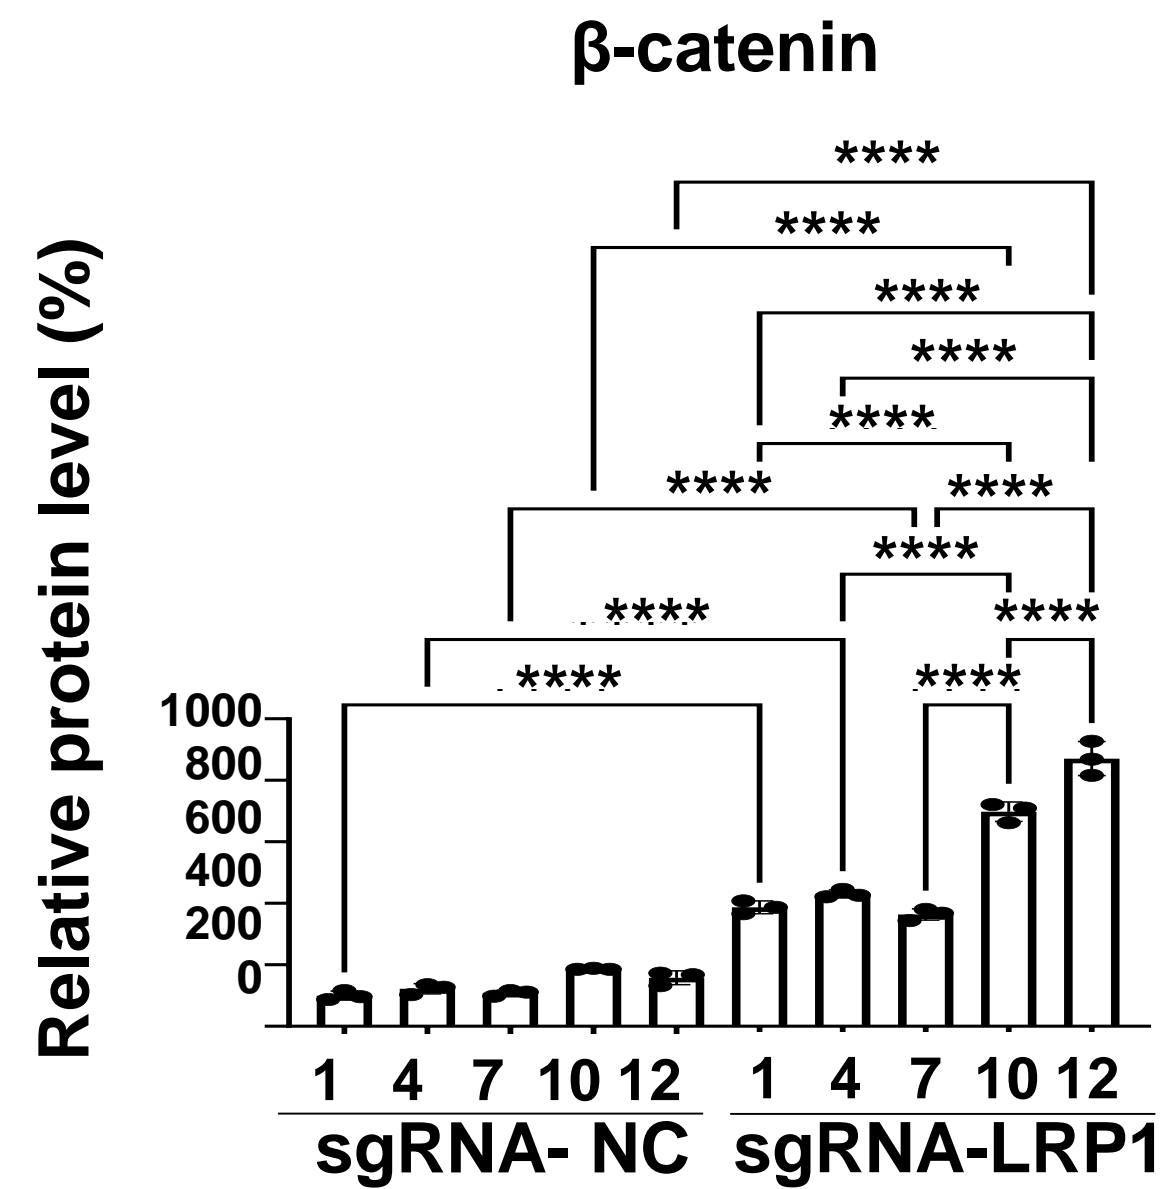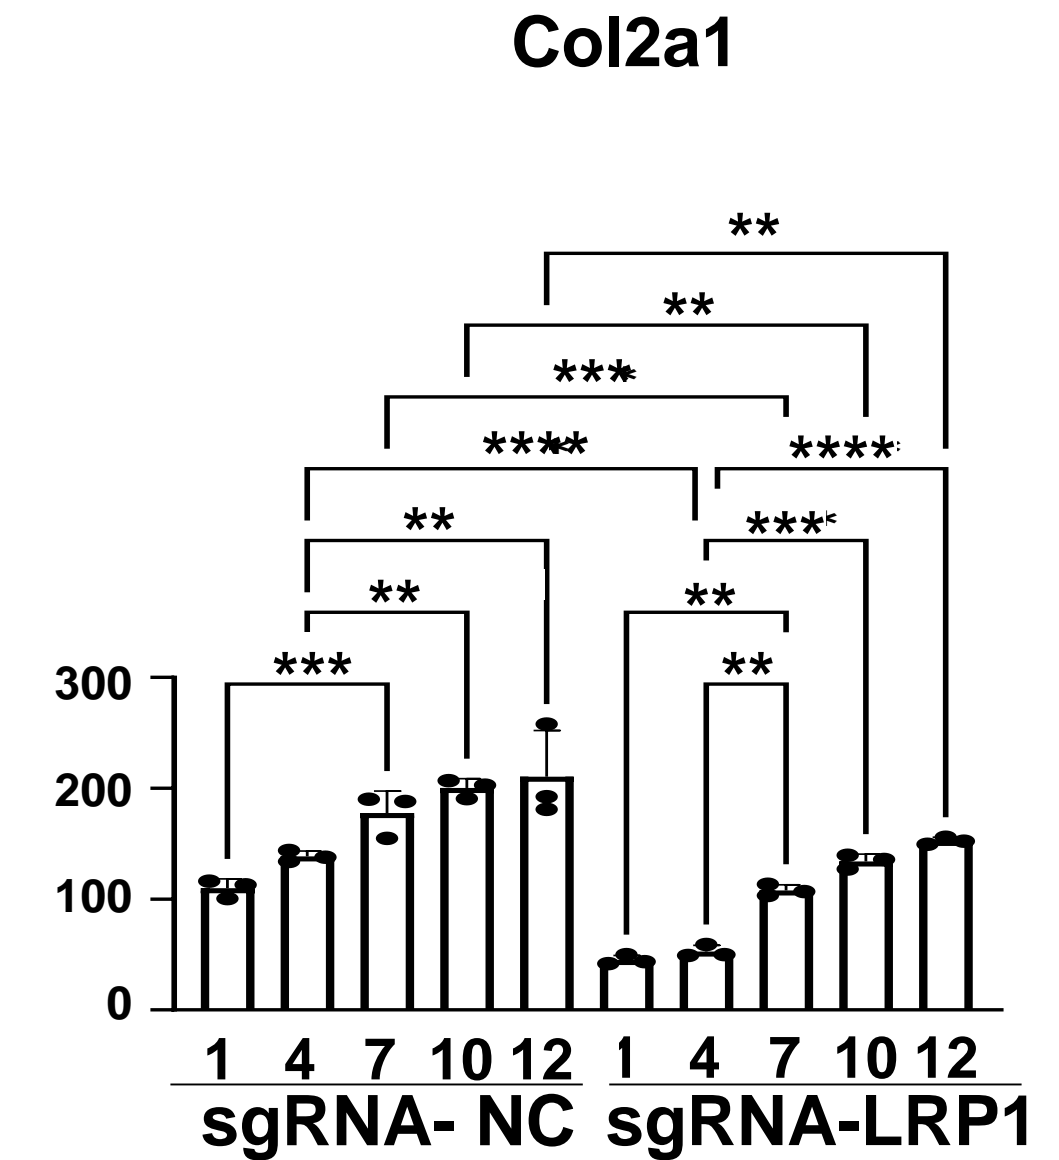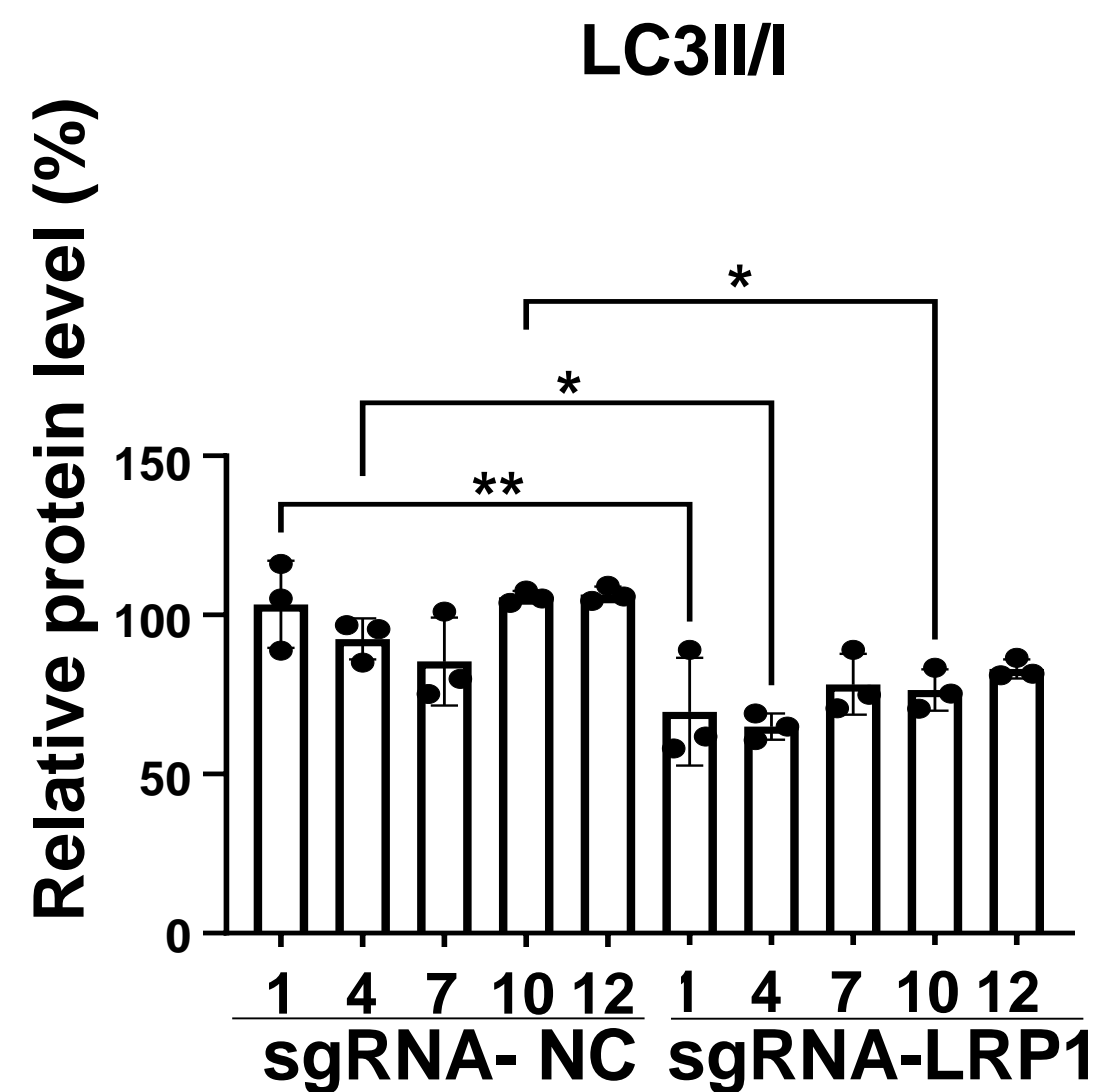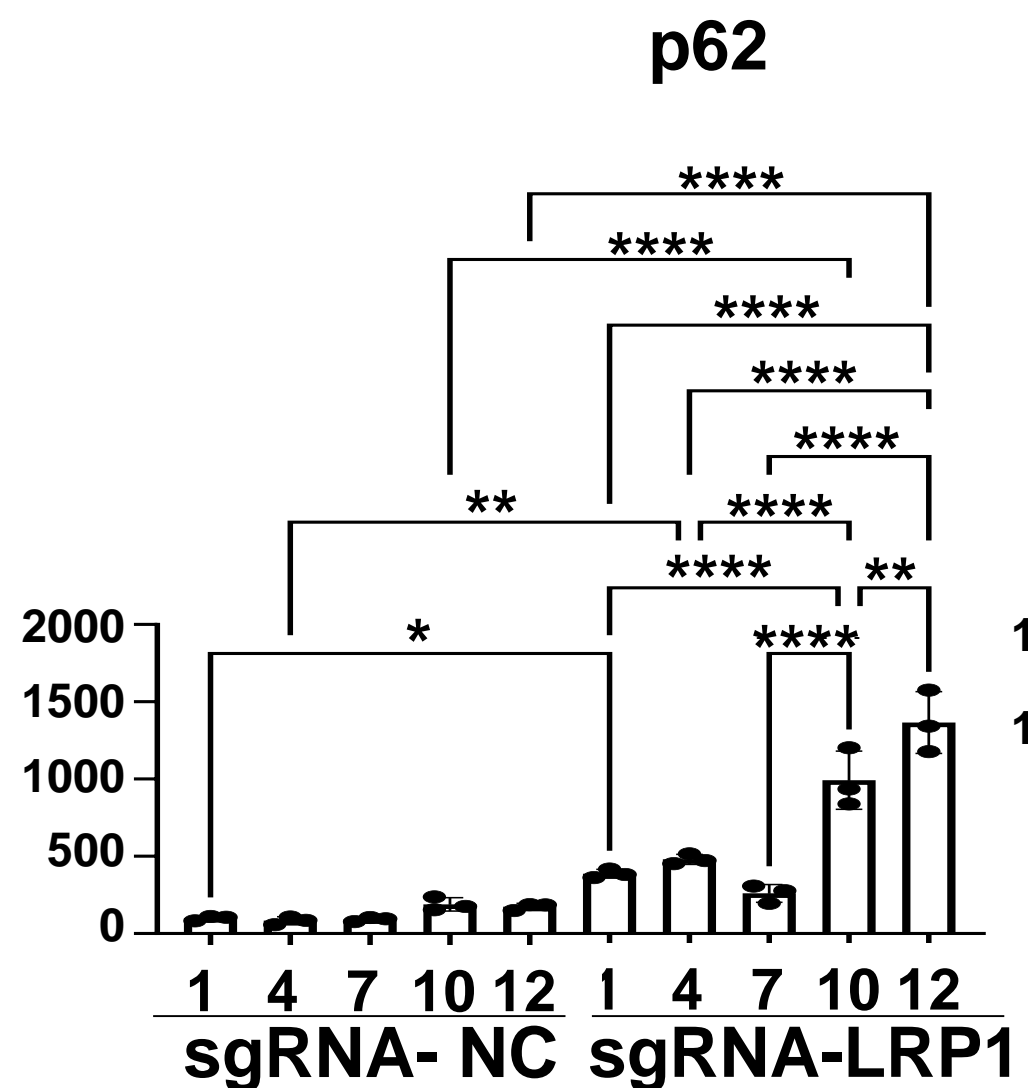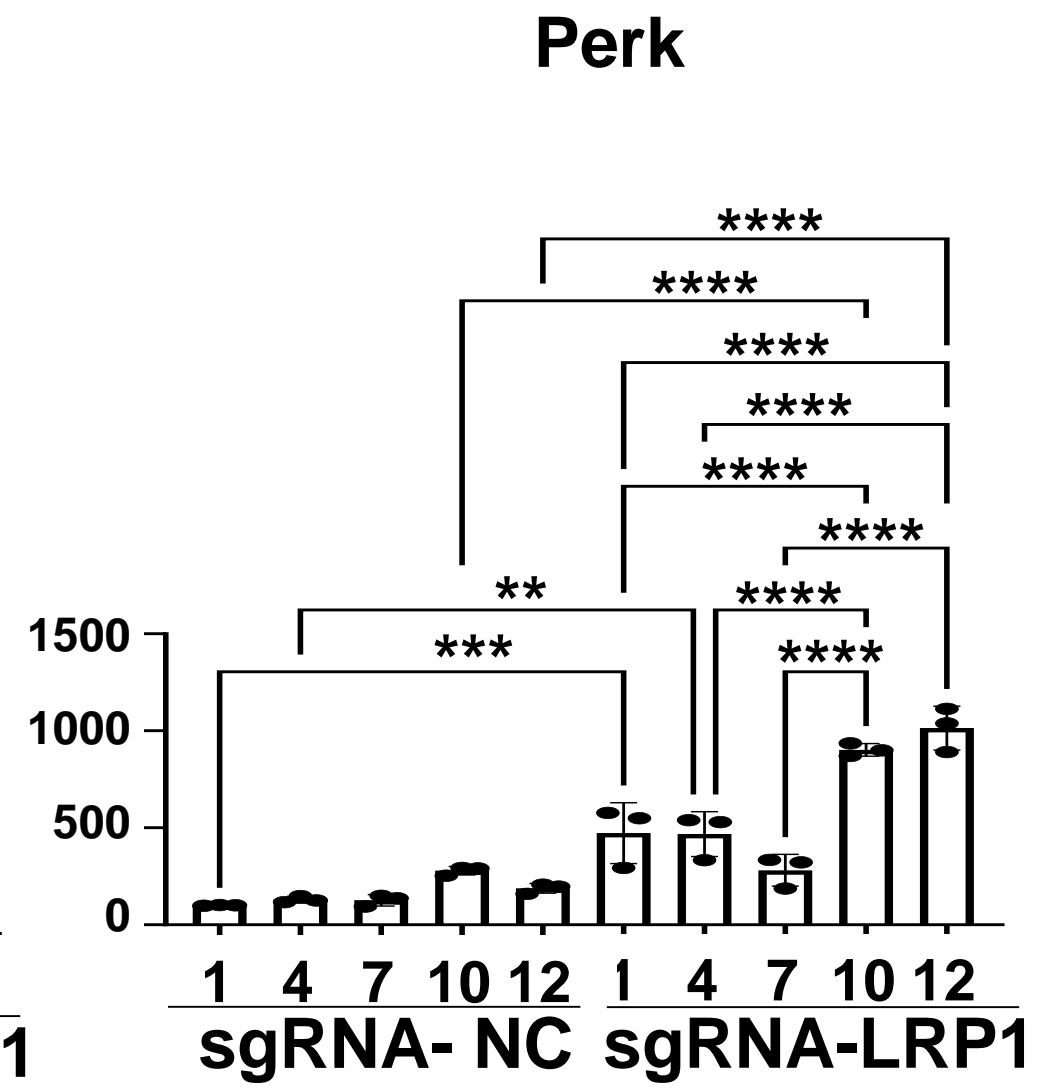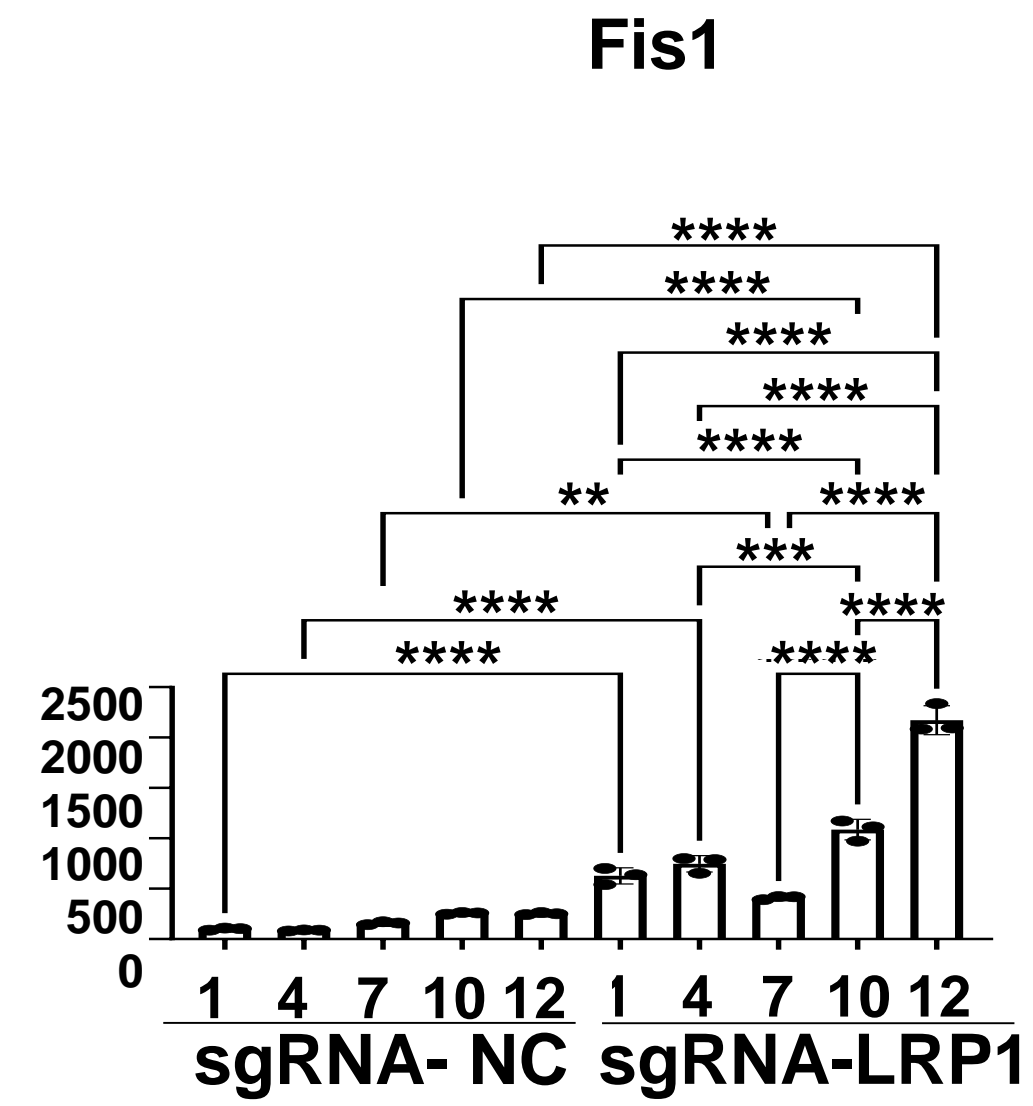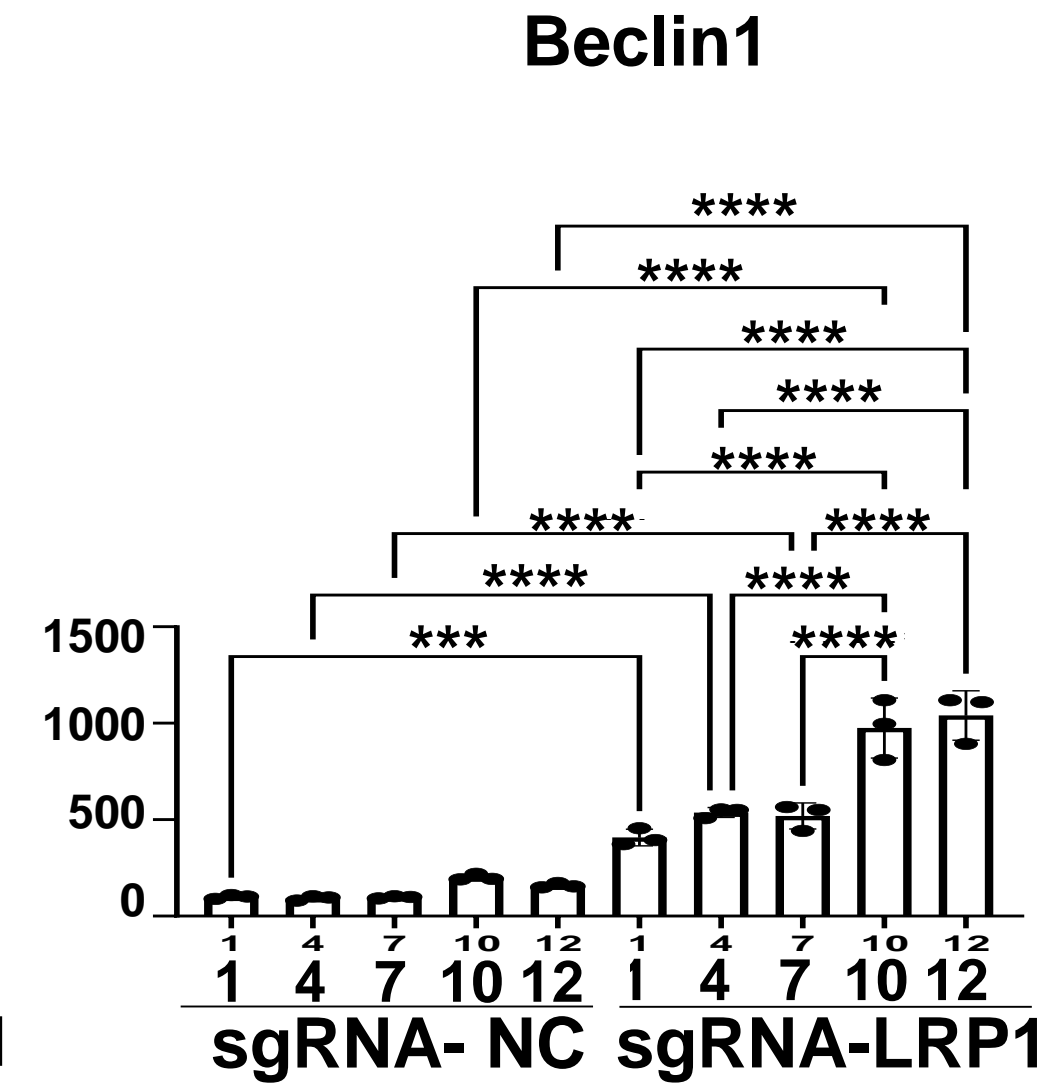

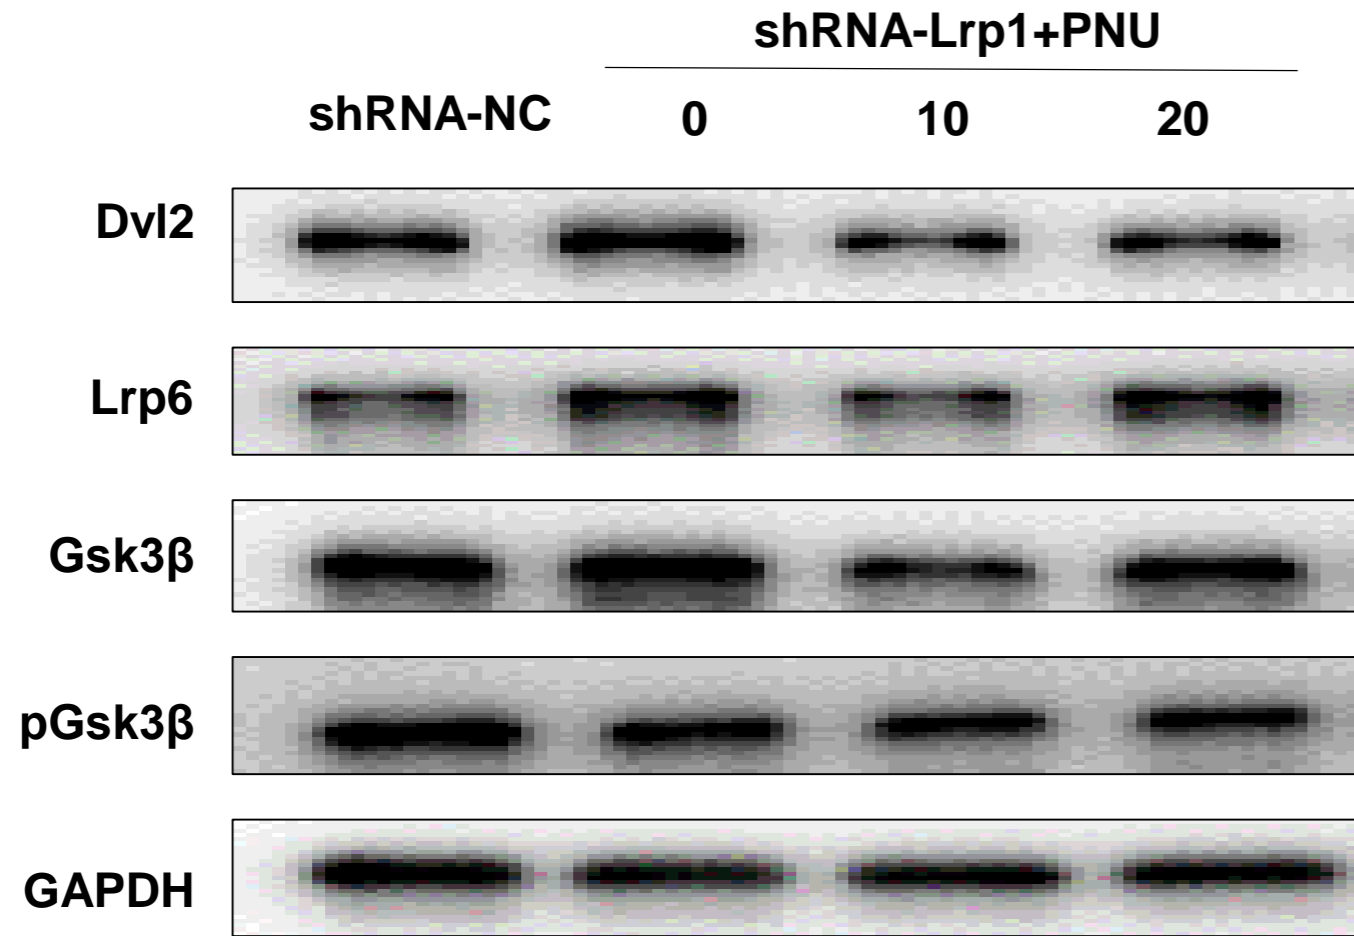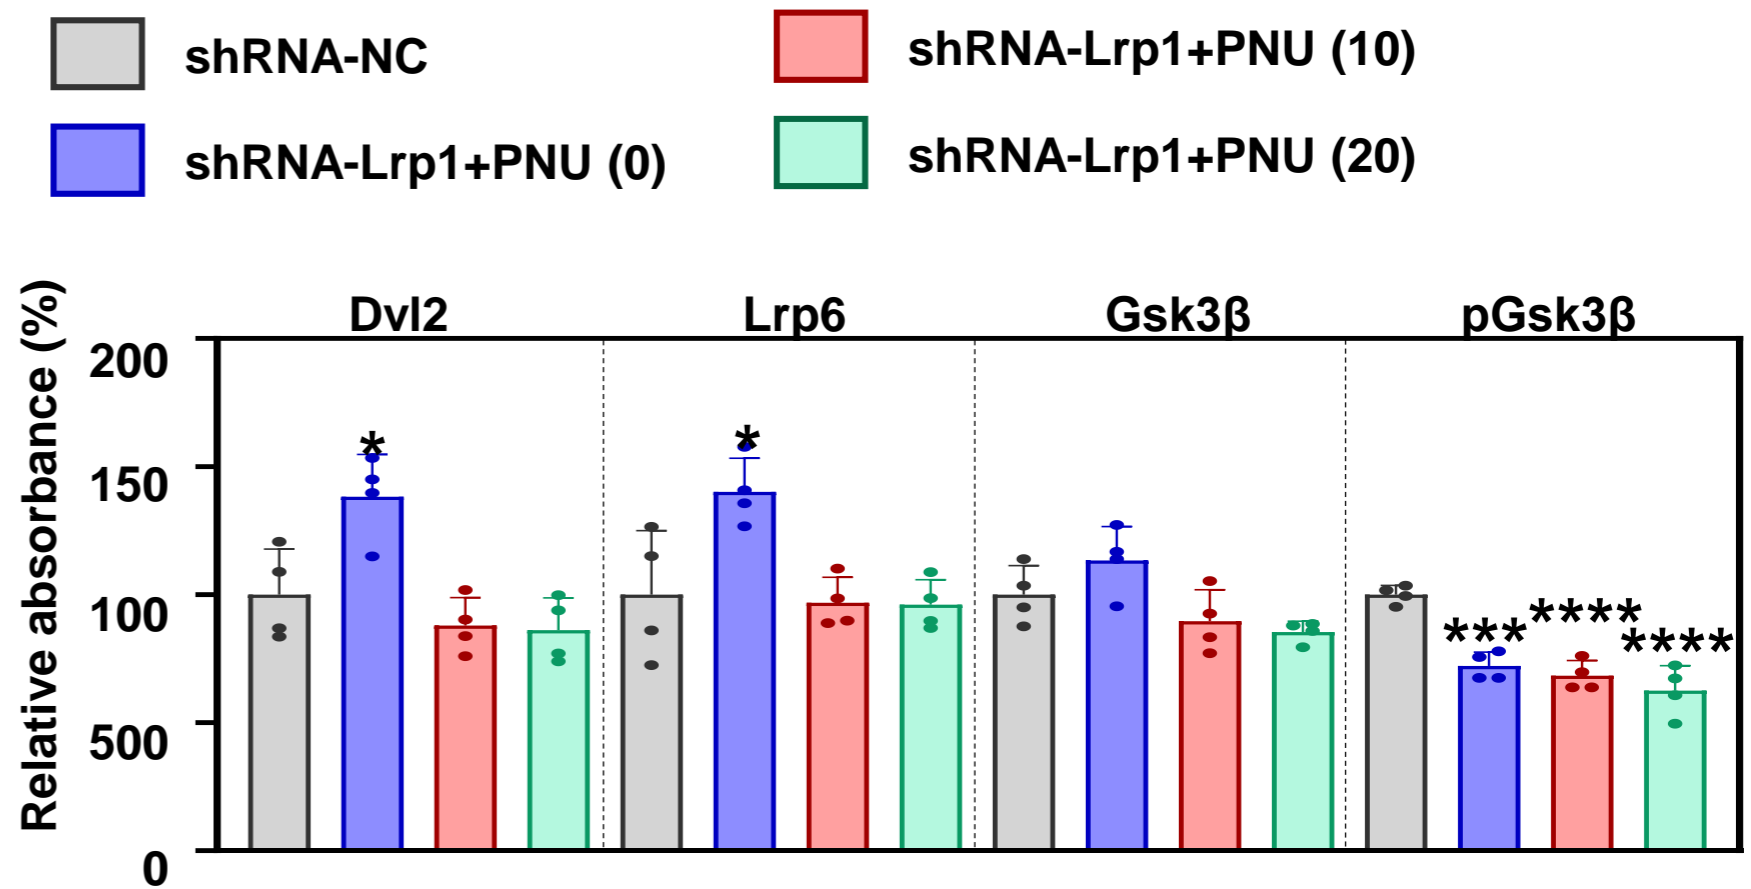

Supplement: pnas.2203557119.sapp.pdf [file pnas.2203557119.sapp.pdf]
